# Supplementary material for: A tannin-derived zirconium-containing porous hybrid for efficient Meerwein–Ponndorf–Verley reduction under mild conditions
Source: Royal Society of Chemistry journal article supplement (doi:10.1039/c9gc03393a), 2019-11-22
Supplement: c9gc03393a1.pdf [file c9gc03393a1.pdf]

## Supporting Information

### Tannin-Derived Zirconium-Containing Porous Hybrid for Efficient Meerwein-Ponndorf-Verley Reduction under Mild Conditions

Yan Leng\*, Langchen Shi, Shengyu Du, Jiusheng Jiang, Pingping Jiang

School of Chemical and Material Engineering, Jiangnan University, Lihu Road 1800#, Wuxi 214122, Jiangsu, China, Email: [yanleng@jiangnan.edu.cn](mailto:yanleng@jiangnan.edu.cn)

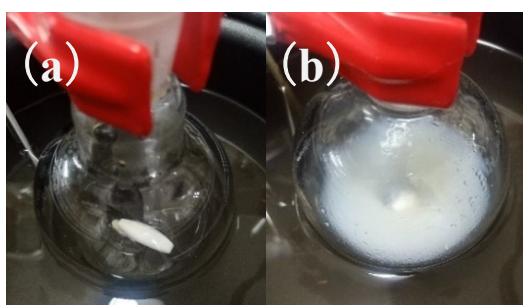

Fig. S1 Synthesis of Zr-tannin, (a) Before adding ZrCl<sub>4</sub>, (b) After adding ZrCl<sub>4</sub>.

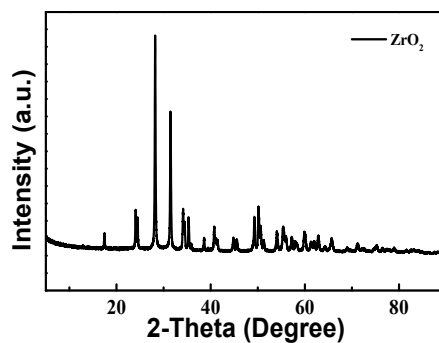

Fig. S2 XRD pattern of ZrO<sub>2</sub>.

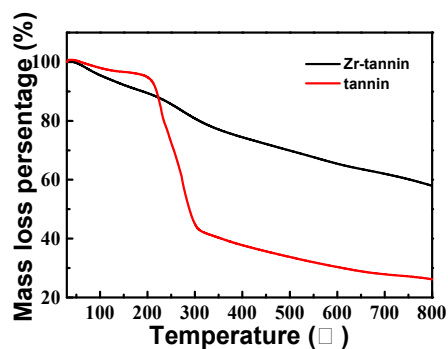

Fig. S3 TG curves of Zr-tannin and tannin.

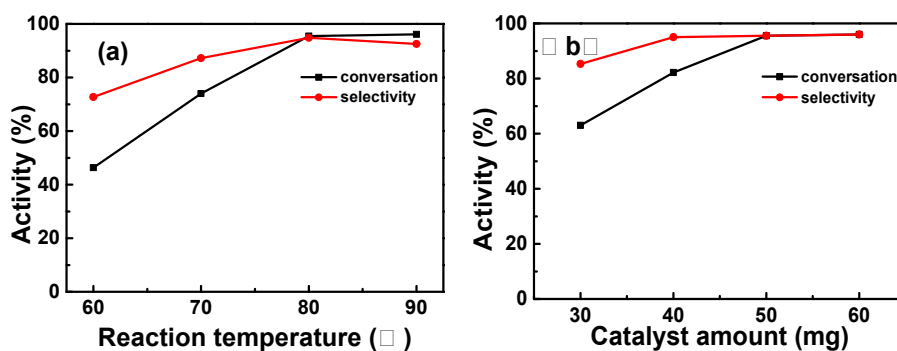

Fig. S4 (a) Effect of temperature on furfural conversion and furfuryl alcohol over Zr-tannin. The main by-product is furfural diisopropyl acetal (FDIA) and (isopropoxymethyl) furan (IPMA), (b) Effect of catalyst amounts. Reaction conditions: furfural: 1 mmol; 2-PrOH :10 mL; reaction temperature: 80 °C; reaction time: 3 h.

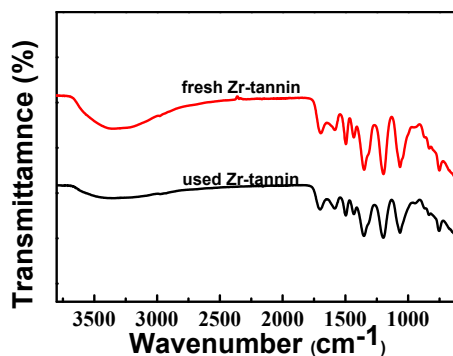

Fig. S5 FT-IR spectra of fresh Zr-tannin and used Zr-tannin.

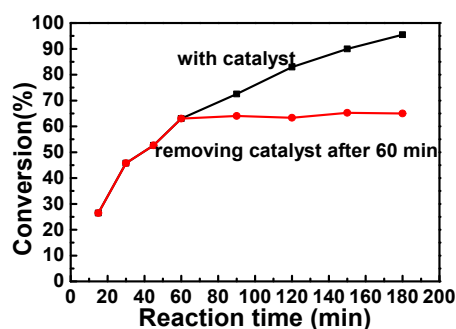

**Fig. S6** Stability of Zr-tannin, the solid catalyst was removed after 1h.

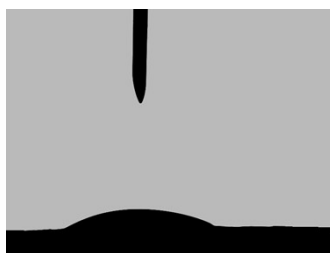

**Fig. S7** Contact angle (CA) of a water droplet on the surface of Zr-tannin.

**Table S1** Transfer hydrogenation of furfural to furfuryl alcohol with different catalysts

| Entry | Catalyst    | T (°C) | Time (h) | Con. (%) | FA sel. (%) | TOF (h <sup>-1</sup> ) | Refer        |
|-------|-------------|--------|----------|----------|-------------|------------------------|--------------|
| 1     | FDCA-Hf     | 100    | 2        | 98       | 97          | 3.0                    | 1            |
| 2     | Mn-NCA-700  | 160    | 1        | 98       | 85          | 2.5                    | 2            |
| 3     | Fe-L1/C-800 | 120    | 6        | 51.5     | 85.4        | 1.5                    | 3            |
| 4     | NiO(P)-300  | 120    | 1        | 70.2     | 96.7        | -                      | 4            |
| 5     | Zr-PW       | 120    | 1        | 99.7     | 98.9        | -                      | 5            |
| 6     | PhP-Zr      | 120    | 2        | 86.8     | 89.4        | -                      | 6            |
| 7     | Zr-LS       | 80     | 3        | 97       | 97          | 1.4                    | 7            |
| 8     | Zr-HAs      | 50     | 15       | 97       | 99          | 0.1                    | 8            |
| 9     | Zr-PN       | 100    | 15       | 93       | 97          | 0.4                    | 9            |
| 10    | Zr-RSL      | 90     | 6        | 93.4     | 86.7        | 1                      | 10           |
| 11    | Zr-PhyA     | 100    | 2        | 98       | 100         | 0.8                    | 11           |
| 12    | Zr-tannin   | 80     | 3        | 96.2     | 95          | 1.4                    | Present work |

References

- 1 H. Li, T. Yang and Z. Fang, *Appl. Catal. B*, 2018, 227, 79–89.
- 2 S. Zhou, G. Chen, X. Feng, M. Wang, T. Song, D. Liu, F. Lu and H. Qi, *Green Chem.*, 2018, 20, 3593–3603.
- 3 J. Li, J. I. Liu, H. j. Zhou and Y. Fu, *ChemSusChem*, 2016, 9, 1339–1347.

- 4 J. He, M R. Nielsen, T. W. Hansen, S. Yang and A. Riisager, *Catal. Sci. Technol.*, 2019, 9, 1289-1300.
- 5 G. Z. Xu, C. Liu, A. Y. Hu, Y. M. Xia, H. J. Wang and X. Liu, *Mol. Catal.*, 2019, 475, 110384.
- 6 H. Li, Y. Li, Z. Fang and R. L. Smith Jr., *Catal. Today*, 2019, 319, 84-92.
- 7 S. Zhou, F. Dai, Z. Xiang, T. Song, D. Liu, F. Lu and H. Qi, *Appl. Catal. B*, 2019, 248, 31-43.
- 8 Y. F. Sha, Z. H. Xiao, H. C. Zhou, K. L. Yang, Y. M. Song, N. LI, R. X. He, K. D. Zhi and Q. S. Liu, *Green Chem.*, 2017, 19, 4829-4837.
- 9 H. Li, J. He, A. Riisager, S. Saravanamurugan, B. Song, S. Yang, *ACS Catal.*, 2016, 6, 7722-7727
- 10 J. L. Hao, L. M. Han, Y. F. Sha, X. X. Yu, H. Y. Liu, X. Y. Ma, Y. Z. Yang, H. C. Zhou and Q. S. Liu, *Fuel*, 2019, 239, 1304-1314.
- 11 J. Song, B. Zhou, H. Zhou, L. Wu, Q. Meng, Z. Liu and B. Han, *Angew. Chem., Int. Ed.*, 2015, 54, 9399-9403.
